# Supplementary material for: TLR agonists polarize interferon responses in conjunction with dendritic cell vaccination in malignant glioma: a randomized phase II Trial
Source: PubMed Central journal article supplement (PMC11078958; doi:10.1038/s41467-024-48073-y), 2024-05-08
Supplement: 41467_2024_48073_MOESM1_ESM.pdf [file 41467_2024_48073_MOESM1_ESM.pdf]

Supplementary Figure 1. CONSORT diagram of clinical trial enrollment.

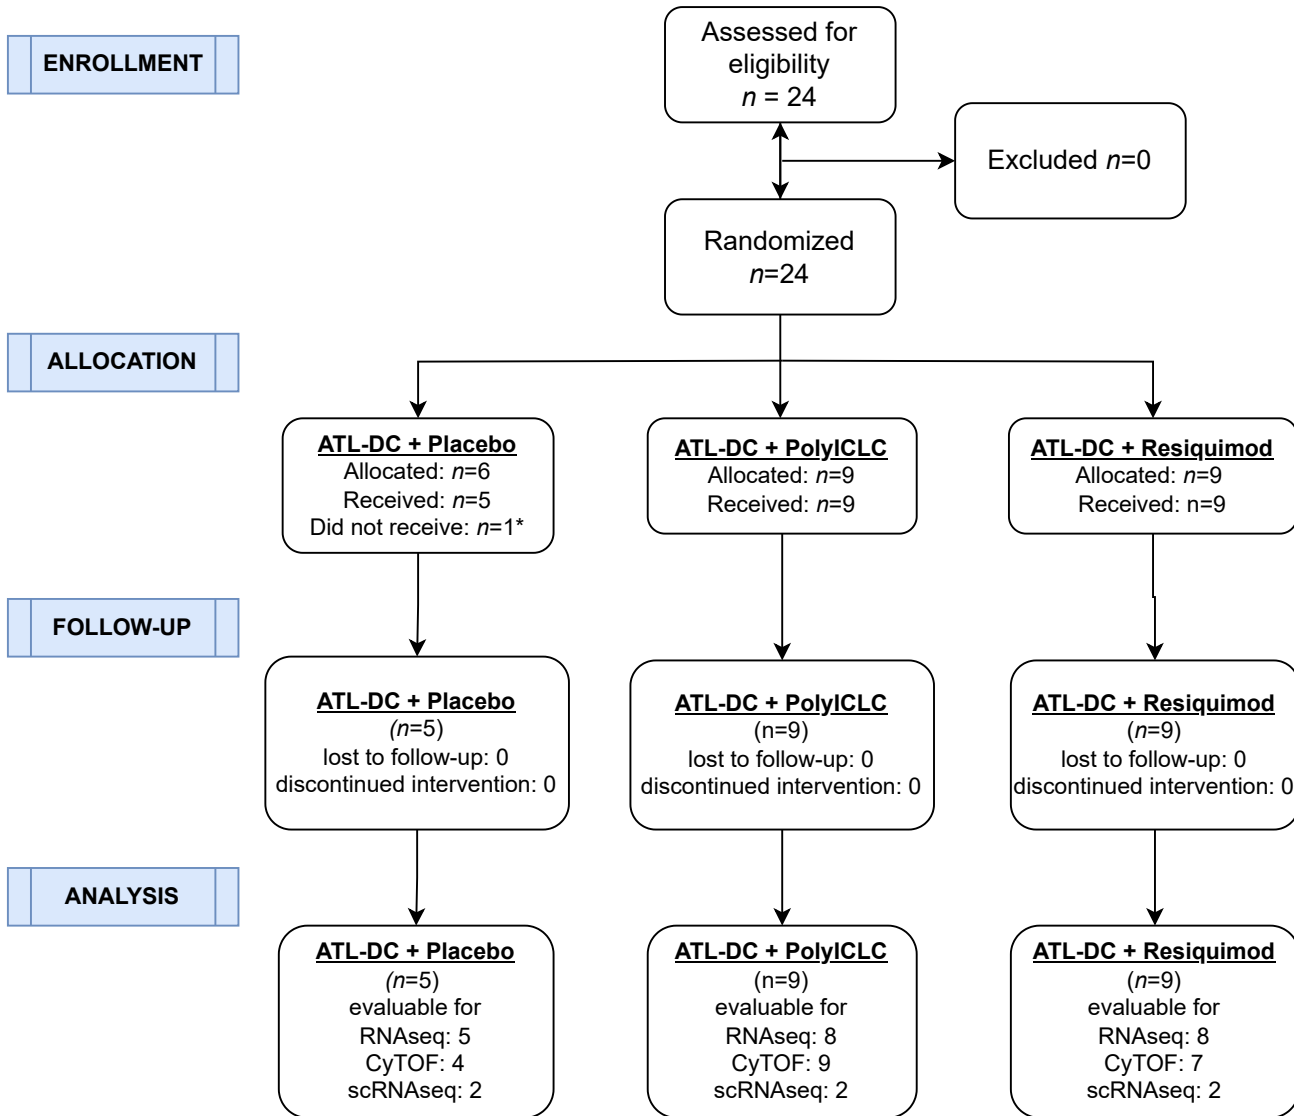

\*due to early progression during vaccine manufacture

Supplementary Figure 1. CONSORT diagram of clinical trial enrollment.

# Supplementary Figure 2

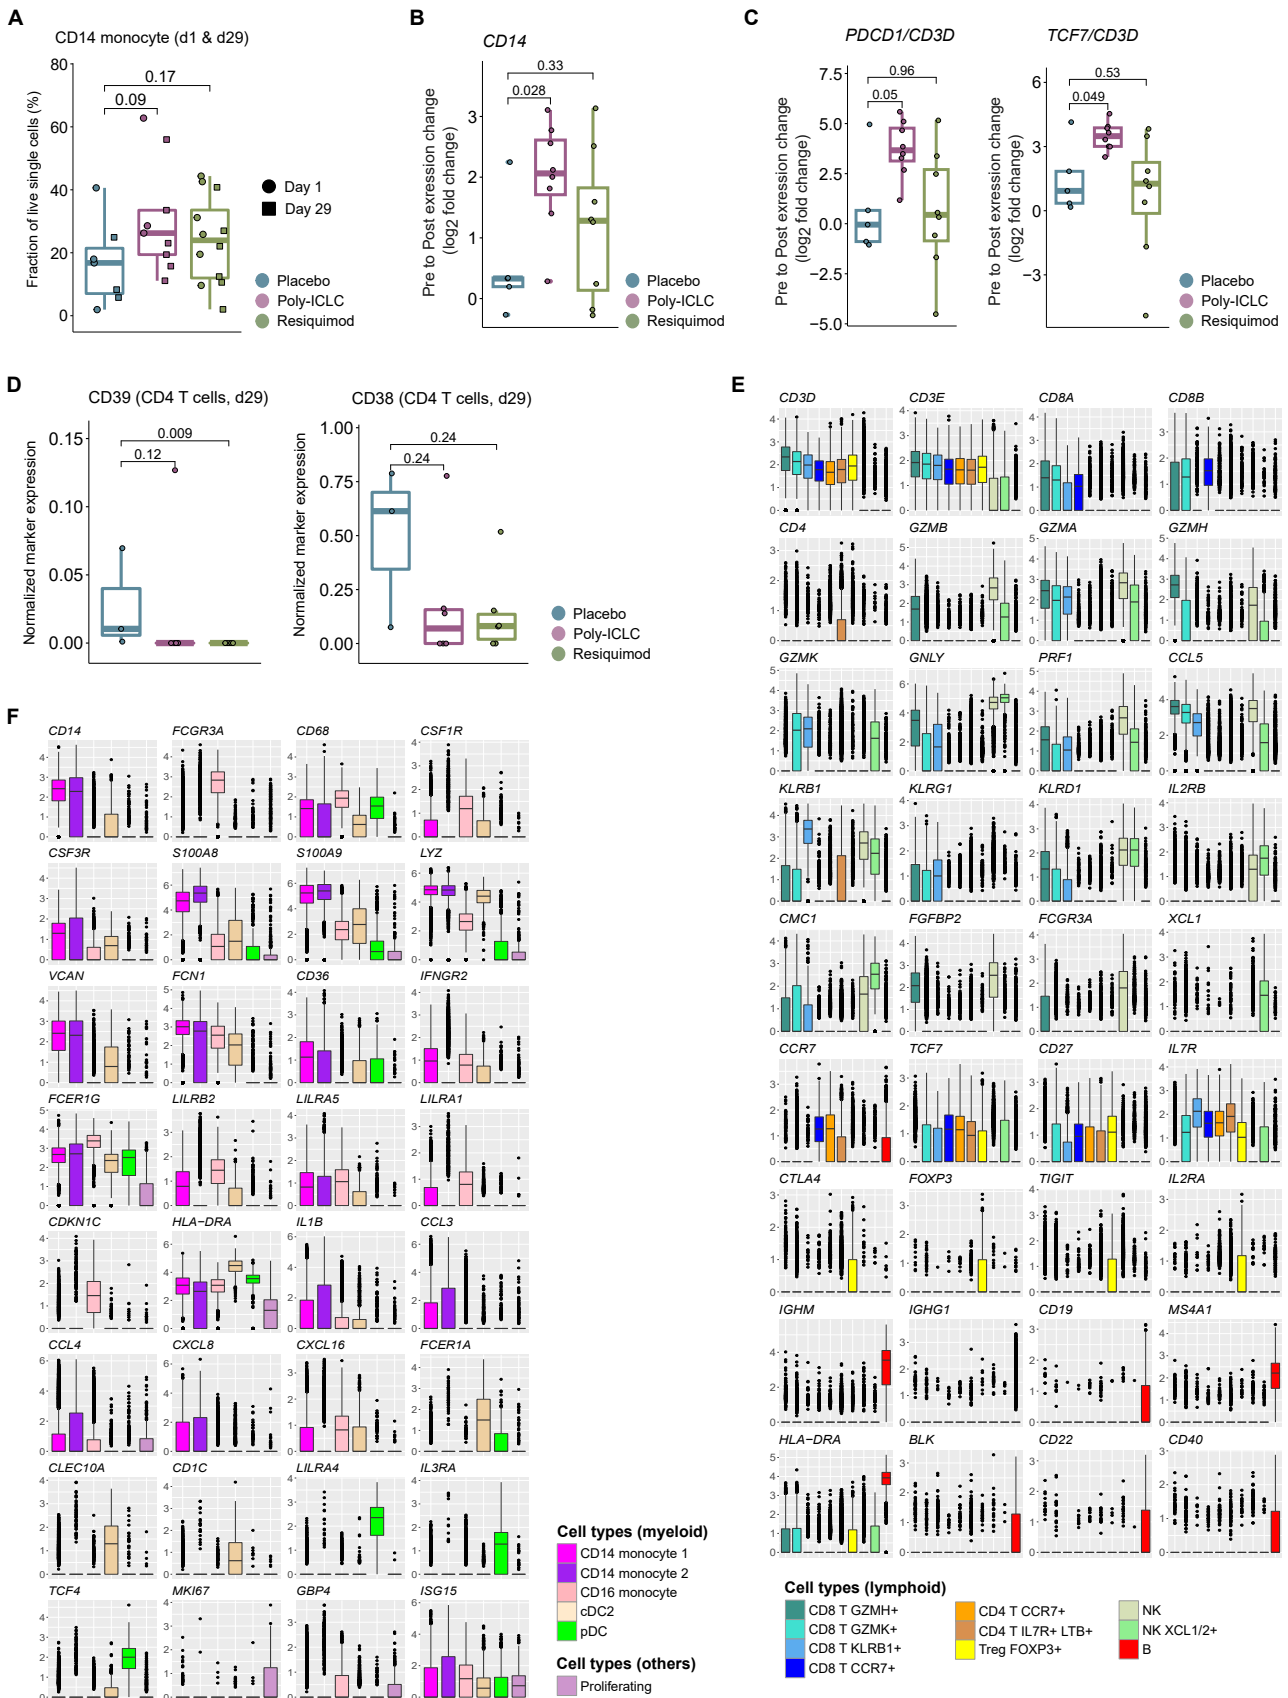

**Supplementary Figure 2.** CyTOF and single cell transcriptomics of patient PBMCs before and after ATL-DC vaccine with or without adjuvant TLR agonist.

**A**, Comparison of CD14+ monocyte fraction in post-treatment PBMCs of patients from indicated treatment groups. P values, two-sided Wilcoxon rank sum test.

**B**, Differential gene expression (pre vs. post-treatment fold change, in  $\log_2$ ) of *CD14* transcript across treatment groups (P values, two-sided Welch t test).

**C**, Differential gene expression (pre vs. post-treatment fold change, in  $\log_2$ ) of *PDCD1* transcript across treatment groups (P values, two-sided Welch t test) after adjusting for the change in *CD3D* transcript expression in the same sample pair. The values approximate the changes of *PDCD1* transcript per T cell.

**D**, Normalized expression of indicated markers in CD4 T cell populations within the PBMC samples of patients from indicated treatment groups. P values, two-sided Wilcoxon rank sum test.

**E, F**, Boxplots showing marker gene expressions in lymphoid cell populations (**E**) or myeloid and proliferative cell populations (**F**).

The number of sample pairs analyzed by CyTOF in **A** and **D** are: ATL-DC+placebo, 4 pairs; ATL-DC+poly-ICLC, 9 pairs; ATL-DC+resiquimod, 7 pairs.

The number of sample pairs analyzed by RNAseq in panels B and C are: ATL-DC+placebo, 5 pairs; ATL-DC+poly-ICLC, 8 pairs; ATL-DC+resiquimod, 8 pairs.

The rectangular box in each boxplot represents the interquartile range (IQR), spanning from the first quartile (25<sup>th</sup> percentile, bottom of box) to the third quartile (75<sup>th</sup> percentile top of box). Inside the box, the median (50<sup>th</sup> percentile) is marked. The whiskers (shown as lines extending from the box) extend to the largest and smallest non-outlier values within 1.5 times the IQR, while outliers lie beyond the whiskers.

# Supplementary Figure 3

**A**

|                     |            |                            |
|---------------------|------------|----------------------------|
| Tx_Group            | Placebo    | -                          |
|                     | Poly-ICLC  | 0.25 (0.05-1.10, p=0.066)  |
|                     | Resiquimod | 0.89 (0.20-4.02, p=0.885)  |
| Age_at_DCvaxSurgery |            | 1.10 (1.02-1.18, p=0.015)  |
| Grade               | III        | -                          |
|                     | IV         | 4.06 (0.96-17.07, p=0.056) |
| MGMT_methylation    | FALSE      | -                          |
|                     | TRUE       | 0.26 (0.06-1.04, p=0.057)  |
| RecurNum            |            | 2.75 (1.25-6.08, p=0.012)  |

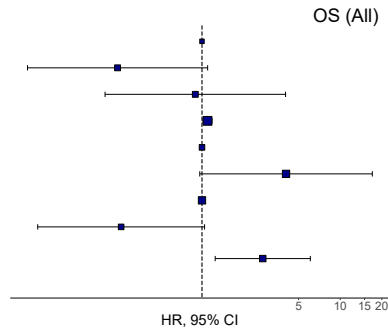

**B**

|                     |            |                           |
|---------------------|------------|---------------------------|
| Tx_Group            | Placebo    | -                         |
|                     | Poly-ICLC  | 0.63 (0.13-3.04, p=0.561) |
|                     | Resiquimod | 1.28 (0.28-5.89, p=0.751) |
| Age_at_DCvaxSurgery |            | 1.04 (0.98-1.12, p=0.213) |
| RecurNum            |            | 2.32 (1.00-5.41, p=0.051) |

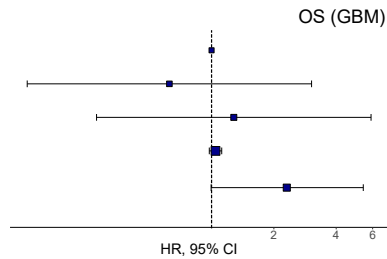

**C**

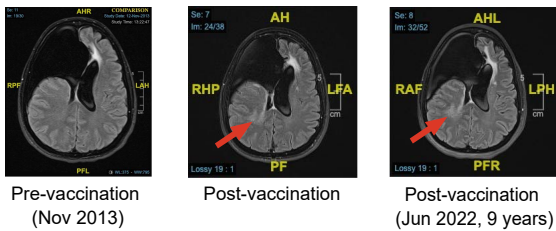

**D**

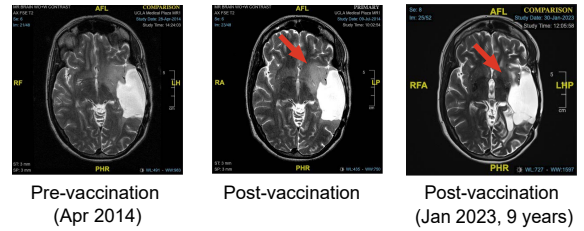

**Supplementary Figure 3.** The association between combined ATL-DC vaccine and TLR agonist and patient survival.

**A, B,** Multivariate Cox proportional hazards analysis assessing the hazard ratios of death in TLR agonist treatment groups against placebo in all patients (**A**) or GBM subset (**B**) after adjusting for other clinical covariates (Tx\_Group=treatment group, RecurNum=number of recurrences prior to ATL-DC treatment; the CoxPH model did not converge when MGMT\_methylation was included). In the forest plot, the squares are the hazard ratio (HR) estimates, the error bars are 95% confidence interval (CI) of the HR, the P value of each covariate is based on its Wald statistics, the P values are not adjusted. In (**A**), the sample distribution in each covariate is Tx\_Group: placebo=5, poly-ICLC=9, resiquimod=9; Grade: III=8, IV=15; MGMT\_methylation: True=8, False=15. In (**B**), Tx\_Group: placebo=4, poly-ICLC=5, resiquimod=6.

**C, D,** Representative contrast-enhanced MR imaging of patients treated with ATL-DC + poly-ICLC showing initial increase of T2/FLAIR MRI signal (red arrows), which either persists (**C**) or regresses (**D**) over time. Both patients have significantly longer PFS and OS than the rest of the patients in the cohort.

# Supplementary Figure 4

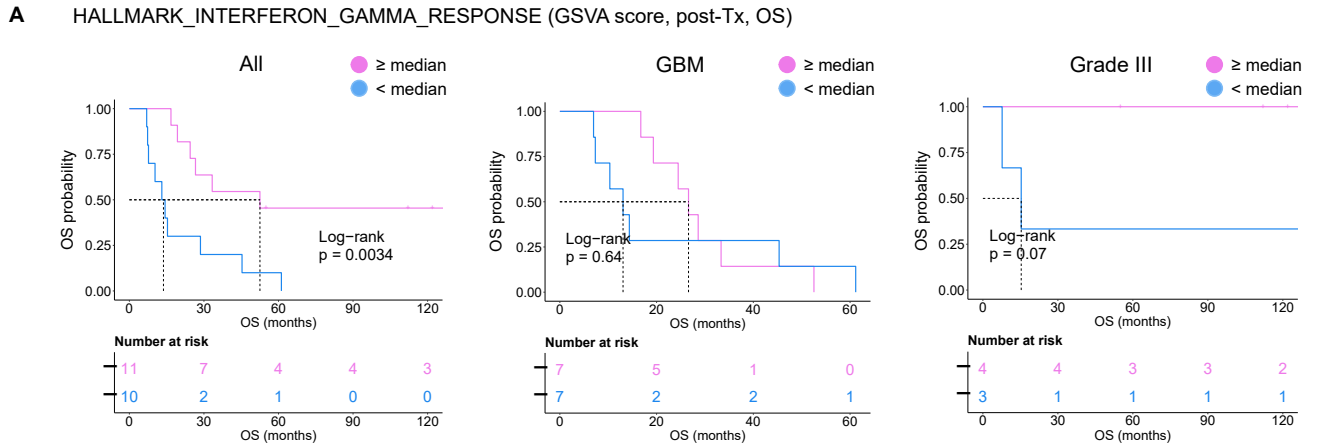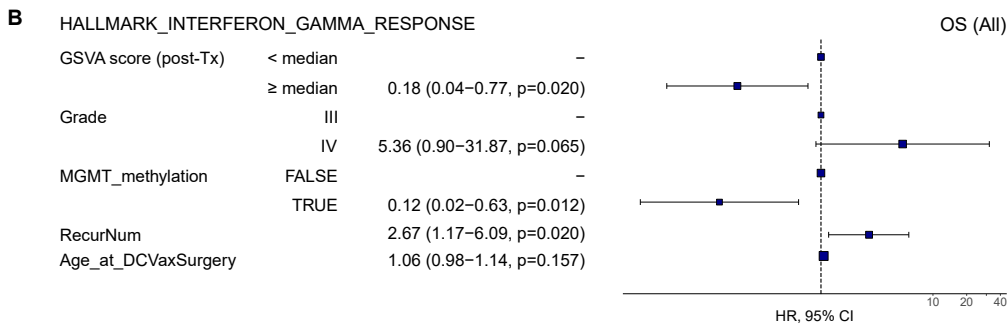

**Supplementary Figure 4.** The association between IFN pathway activation and overall survival after ATL-DC vaccine and TLR agonist therapy.

**A,** Kaplan-Meier overall survival curves of all patients (left), GBM (center), and Grade III glioma subsets (right) stratified by their HALLMARK\_INTERFERON\_GAMMA\_RESPONSE GSVA scores in their post-treatment PBMCs. P values, log-rank test.

**B,** Multivariate Cox proportional hazards analysis assessing hazard ratios of death in patients with high HALLMARK\_INTERFERON\_GAMMA\_RESPONSE GSVA score after adjusting for other clinical covariates. In the forest plot, the squares are the hazard ratio (HR) estimates, the error bars are 95% confidence interval (CI) of the HR, the P value of each covariate is based on its Wald statistics, the P values are not adjusted. The sample distribution in each covariate is GSVA score (post-Tx): <median=10, ≥median=11; Grade: III=7, IV=14; MGMT\_methylation: True=7, False=14.
